# Supplementary material
Source: HighWire-hosted journal article supplement (https://drc.bmj.com/content/9/1/e001894)
Supplement: inline-supplementary-material-1 [file inline-supplementary-material-1.pdf]

Figure S1. CONSIRT Flow Diagram

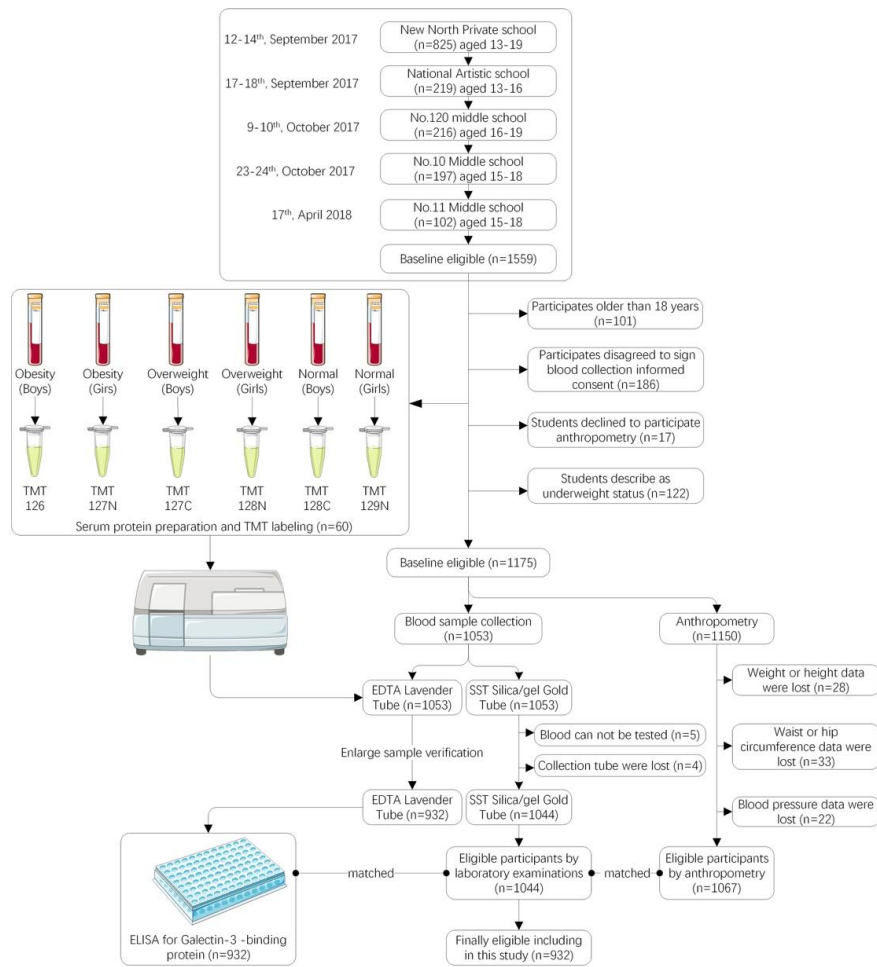

TableS1. TMT overview

|                 | Normal<br>Weight 1<br>(n=10) | Normal<br>Weight 2<br>(n=10) | Overweight 1<br>(n=10) | Overweight 2<br>(n=10) | Obesity 1<br>(n=10) | Obesity 2<br>(n=10) |
|-----------------|------------------------------|------------------------------|------------------------|------------------------|---------------------|---------------------|
| TMT label       | 128C                         | 129N                         | 127C                   | 128N                   | 126                 | 127N                |
| Gender, M/F     | 10/0                         | 0/10                         | 10/0                   | 0/10                   | 10/0                | 0/10                |
| Age, (years)    | 15.8 (1.14)                  | 15.9 (1.14)                  | 15.7 (0.48)            | 15.6 (0.7)             | 15.9 (0.99)         | 15.4 (0.97)         |
| BMI             | 21.15 (0.95)                 | 20.47 (1.03)                 | 25.11 (0.96)           | 26.01 (0.91)           | 33.50 (2.81)        | 33.81 (3.00)        |
| WC (cm)         | 72.6 (5.38)                  | 67.5 (3.38)                  | 80.7 (5.66)            | 76.8 (2.86)            | 98.9 (7.78)         | 92.7 (9.14)         |
| SBP (mmHg)      | 119.8 (10.85)                | 112.9 (8.94)                 | 124.5 (9.12)           | 118.4 (13.91)          | 140.6 (19.07)       | 135.5 (12.36)       |
| DBP (mmHg)      | 63.5 (7.32)                  | 69 (13.24)                   | 67 (10.04)             | 69.2 (10.89)           | 76.9 (13.03)        | 71.8 (7.8)          |
| Pulse rate      | 75.8 (11.46)                 | 84.1 (14.31)                 | 78.7 (18.05)           | 89.9 (10.5)            | 82 (10.24)          | 88.8 (9.89)         |
| FPG<br>(mmol/L) | 4.18 (0.28)                  | 4.14 (0.39)                  | 4.07 (0.44)            | 4.11 (1.49)            | 3.66 (1.35)         | 4.3 (0.38)          |
| TG, mmol/L      | 0.61 (0.19)                  | 1.00 (0.51)                  | 0.71 (0.18)            | 0.95 (0.49)            | 1.32 (0.79)         | 1.27 (0.43)         |
| TC, mmol/L      | 3.86 (0.87)                  | 4.05 (0.74)                  | 3.39 (0.32)            | 3.61 (1.45)            | 3.62 (1.37)         | 4.36 (0.5)          |

Figure S2. Validation of MS data.

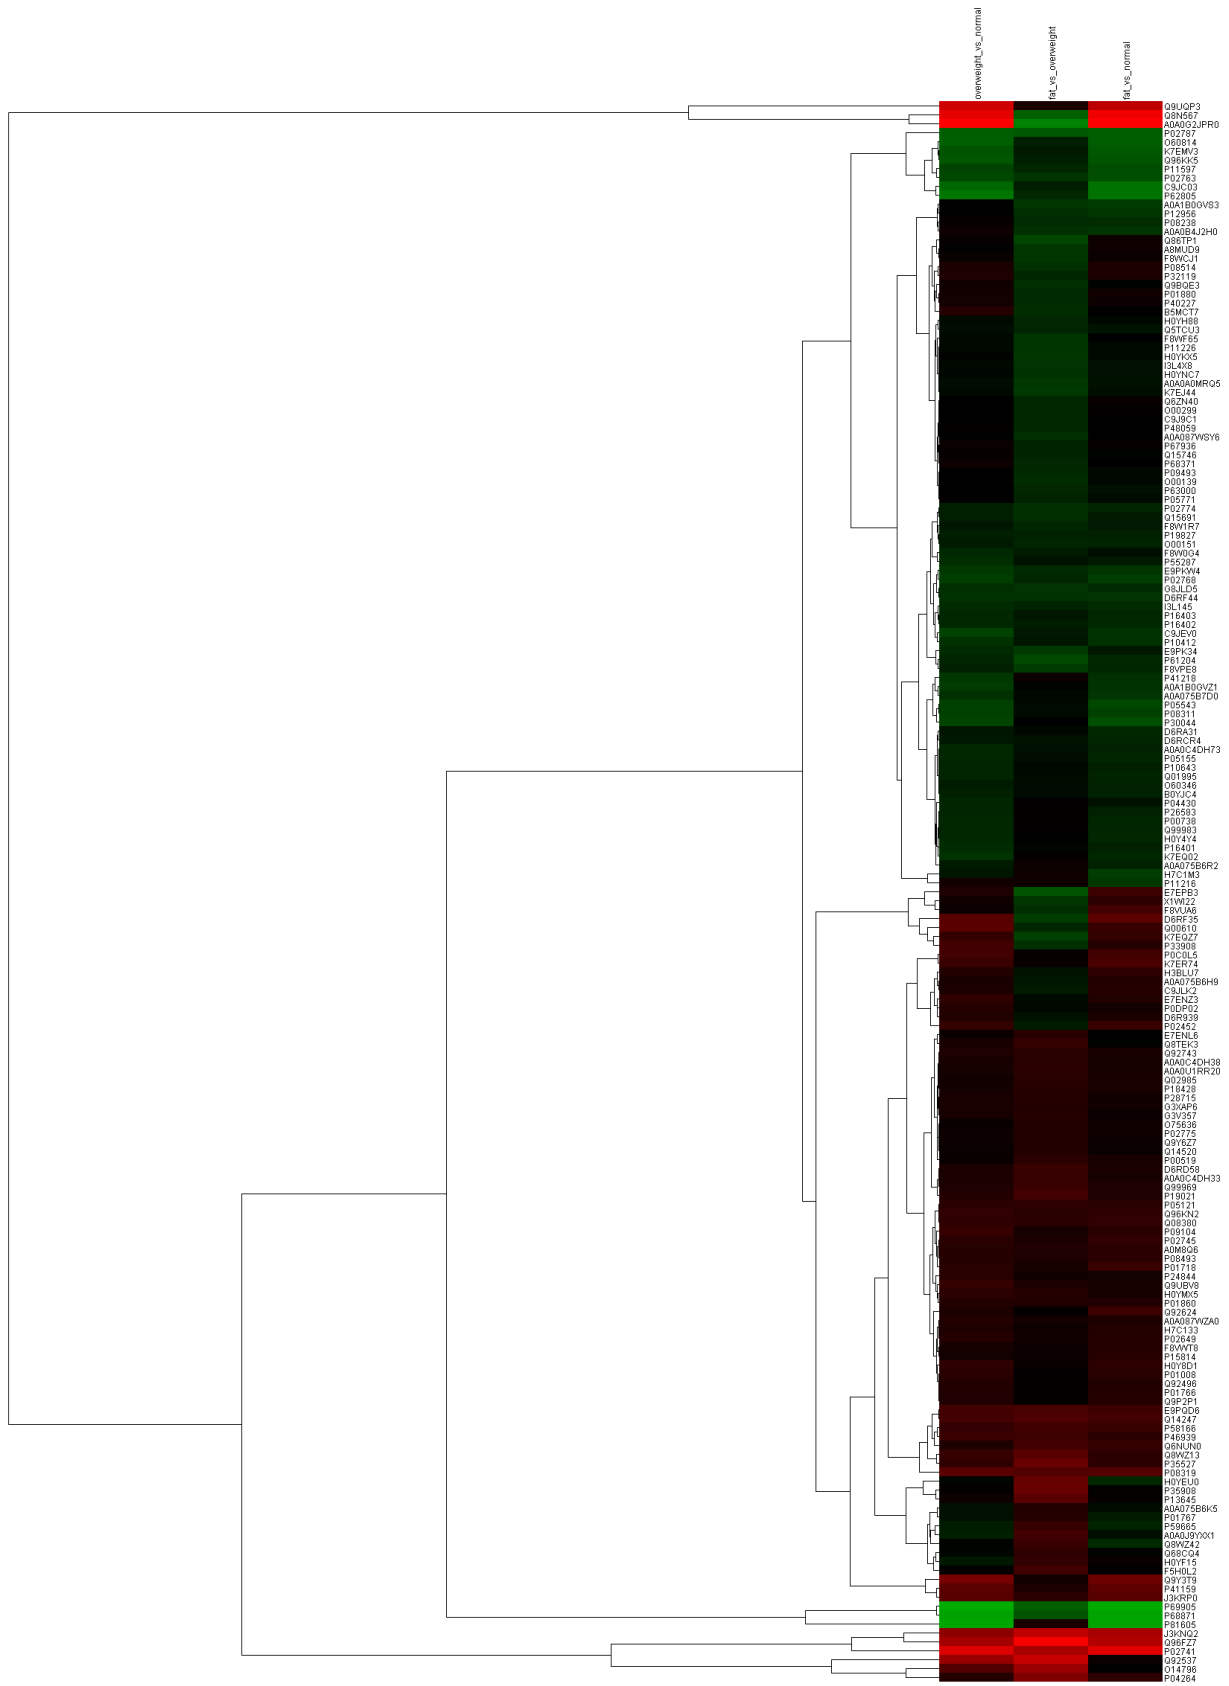

Figure S3. MS analyses on serum samples among adolescents with different weight states

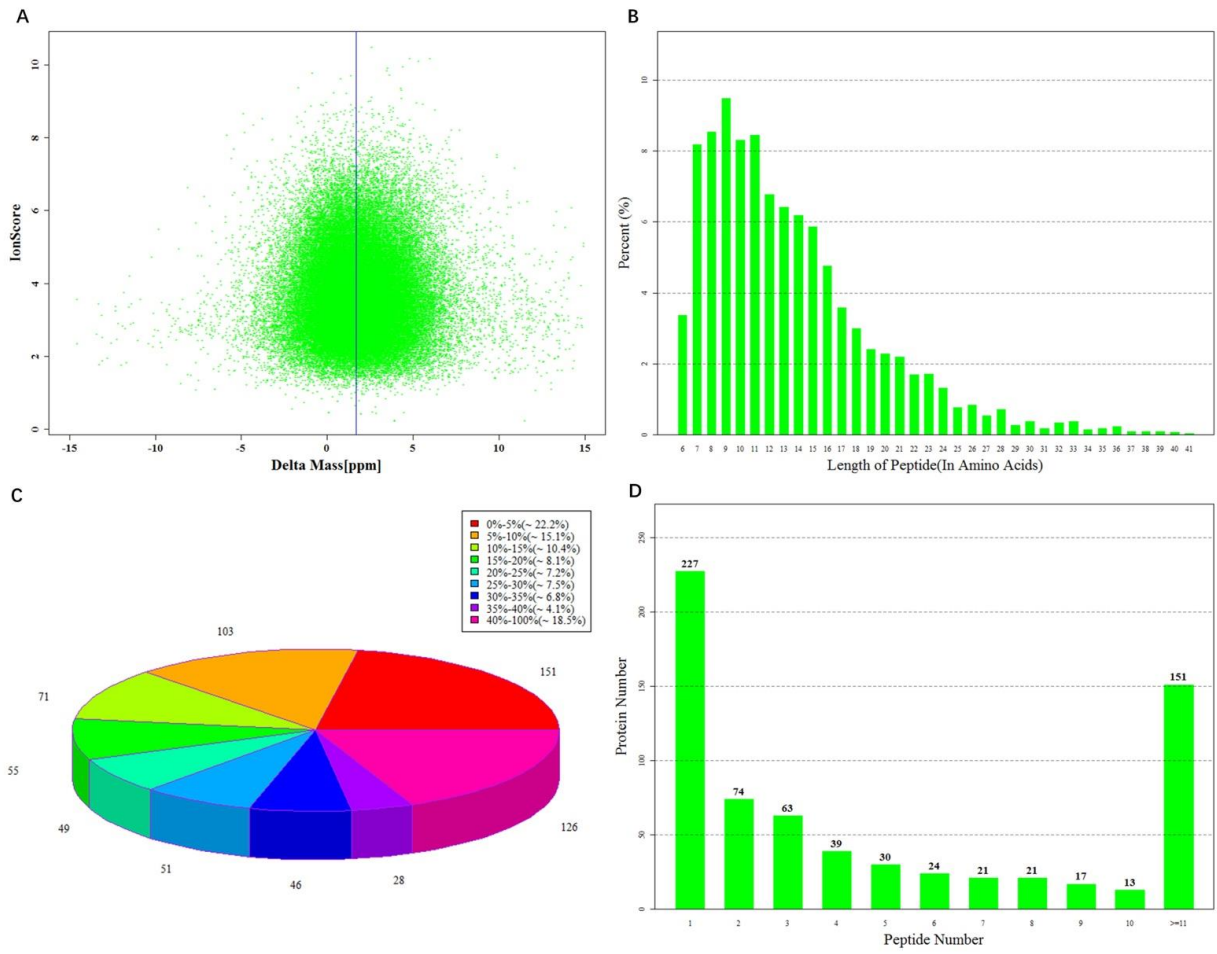

Table S2. Differentially expressed proteins according to KEGG network analysis

| Accession  | Description                                                                                                           | OW/NW    | OB/OW    | OB/NW    |
|------------|-----------------------------------------------------------------------------------------------------------------------|----------|----------|----------|
| P35527     | Keratin, type I cytoskeletal 9 OS=Homo sapiens<br>GN=KRT9 PE=1 SV=3 - [K1C9_HUMAN]                                    | 1.30394  | 1.767714 | 1.274833 |
| P11597     | Cholesteryl ester transfer protein OS=Homo sapiens<br>GN=CETP PE=1 SV=2 - [CETP_HUMAN]                                | 0.690793 | 0.810914 | 0.655009 |
| E9PKW4     | Sulfotransferase OS=Homo sapiens GN=SULT1A2<br>PE=1 SV=1 - [E9PKW4_HUMAN]                                             | 0.733    | 0.78925  | 0.74775  |
| Q96KN2     | Beta-Ala-His dipeptidase OS=Homo sapiens<br>GN=CNDP1 PE=1 SV=4 - [CNDP1_HUMAN]                                        | 1.310214 | 1.24844  | 1.286774 |
| P05121     | Plasminogen activator inhibitor 1 OS=Homo sapiens<br>GN=SERPINE1 PE=1 SV=1 - [PAI1_HUMAN]                             | 1.266375 | 1.289375 | 1.2565   |
| P69905     | Hemoglobin subunit alpha OS=Homo sapiens<br>GN=HBA1 PE=1 SV=2 - [HBA_HUMAN]                                           | 0.390927 | 0.591819 | 0.393191 |
| J3KNQ2     | Fibronectin type III domain-containing protein 1<br>(Fragment) OS=Homo sapiens GN=FNDC1 PE=1<br>SV=1 - [J3KNQ2_HUMAN] | 2.17825  | 2.83575  | 2.47725  |
| Q96FZ7     | Charged multivesicular body protein 6 OS=Homo sapiens<br>GN=CHMP6 PE=1 SV=3 - [CHMP6_HUMAN]                           | 2.44225  | 3.84175  | 2.6555   |
| P08319     | Alcohol dehydrogenase 4 OS=Homo sapiens<br>GN=ADH4 PE=1 SV=5 - [ADH4_HUMAN]                                           | 1.6318   | 1.55905  | 1.57985  |
| K7EQZ7     | Protein flightless-1 homolog (Fragment) OS=Homo sapiens<br>GN=FLII PE=1 SV=1 - [K7EQZ7_HUMAN]                         | 1.32175  | 0.70625  | 1.3265   |
| P61204     | ADP-ribosylation factor 3 OS=Homo sapiens<br>GN=ARF3 PE=1 SV=2 - [ARF3_HUMAN]                                         | 0.817417 | 0.674417 | 0.801083 |
| J3KRP0     | Beta-Ala-His dipeptidase OS=Homo sapiens<br>GN=CNDP1 PE=1 SV=2 - [J3KRP0_HUMAN]                                       | 1.60025  | 1.2605   | 1.60325  |
| D6RF35     | Vitamin D-binding protein OS=Homo sapiens<br>GN=GC PE=1 SV=1 - [D6RF35_HUMAN]                                         | 1.607906 | 0.72125  | 1.657188 |
| A0A0G2JPR0 | Complement C4-A OS=Homo sapiens GN=C4A<br>PE=1 SV=1 - [A0A0G2JPR0_HUMAN]                                              | 4.468295 | 0.489    | 4.228773 |
| Q08380     | Galectin-3-binding protein OS=Homo sapiens<br>GN=LGALS3BP PE=1 SV=1 - [LG3BP_HUMAN]                                   | 1.290485 | 1.284614 | 1.311892 |
| P62805     | Histone H4 OS=Homo sapiens GN=HIST1H4A<br>PE=1 SV=2 - [H4_HUMAN]                                                      | 0.520005 | 0.806054 | 0.534228 |
| P02763     | Alpha-1-acid glycoprotein 1 OS=Homo sapiens<br>GN=ORM1 PE=1 SV=1 - [A1AG1_HUMAN]                                      | 0.673893 | 0.749839 | 0.646857 |
| D6RF44     | Heterogeneous nuclear ribonucleoprotein D0<br>(Fragment) OS=Homo sapiens GN=HNRNPD<br>PE=1 SV=8 - [D6RF44_HUMAN]      | 0.762125 | 0.763125 | 0.756375 |
| P68871     | Hemoglobin subunit beta OS=Homo sapiens<br>GN=HBB PE=1 SV=2 - [HBB_HUMAN]                                             | 0.411058 | 0.630337 | 0.407713 |
| P02768     | Serum albumin OS=Homo sapiens GN=ALB PE=1<br>SV=2 - [ALBU_HUMAN]                                                      | 0.710281 | 0.808015 | 0.714537 |
| P04264     | Keratin, type II cytoskeletal 1 OS=Homo sapiens<br>GN=KRT1 PE=1 SV=6 - [K2C1_HUMAN]                                   | 1.214047 | 2.019966 | 1.257814 |
| P58166     | Inhibin beta E chain OS=Homo sapiens GN=INHBE                                                                         | 1.316    | 1.431125 | 1.365875 |

---

|        |                                              |          |          |          |
|--------|----------------------------------------------|----------|----------|----------|
|        | PE=1 SV=1 - [INHBE_HUMAN]                    |          |          |          |
| P02741 | C-reactive protein OS=Homo sapiens GN=CRP    | 3.350727 | 2.497014 | 3.419074 |
|        | PE=1 SV=1 - [CRP_HUMAN]                      |          |          |          |
| I3L145 | Sex hormone-binding globulin OS=Homo sapiens | 0.787779 | 0.819676 | 0.78925  |
|        | GN=SHBG PE=1 SV=1 - [I3L145_HUMAN]           |          |          |          |
| E9PQD6 | Serum amyloid A protein OS=Homo sapiens      | 1.44325  | 1.483857 | 1.396214 |
|        | GN=SAA1 PE=1 SV=1 - [E9PQD6_HUMAN]           |          |          |          |
| P02787 | Serotransferrin OS=Homo sapiens GN=TF PE=1   | 0.597974 | 0.615791 | 0.596658 |
|        | SV=3 - [TRFE_HUMAN]                          |          |          |          |

---
